# Supplementary material
Source: PubMed Central journal article supplement (PMC3032072)
Supplement: mmc1.pdf [file mmc1.pdf]

## Supplemental Data

### Abraham's Children in the Genome Era: Major Jewish

### Diaspora Populations Comprise Distinct Genetic

### Clusters with Shared Middle Eastern Ancestry

Gil Atzmon, Li Hao, Itzik Pe'er, Christopher Velez, Alexander Pearlman, Pier Francesco Palamara, Bernice Morrow, Eitan Friedman, Carole Oddoux, Edward Burns, and Harry Ostrer

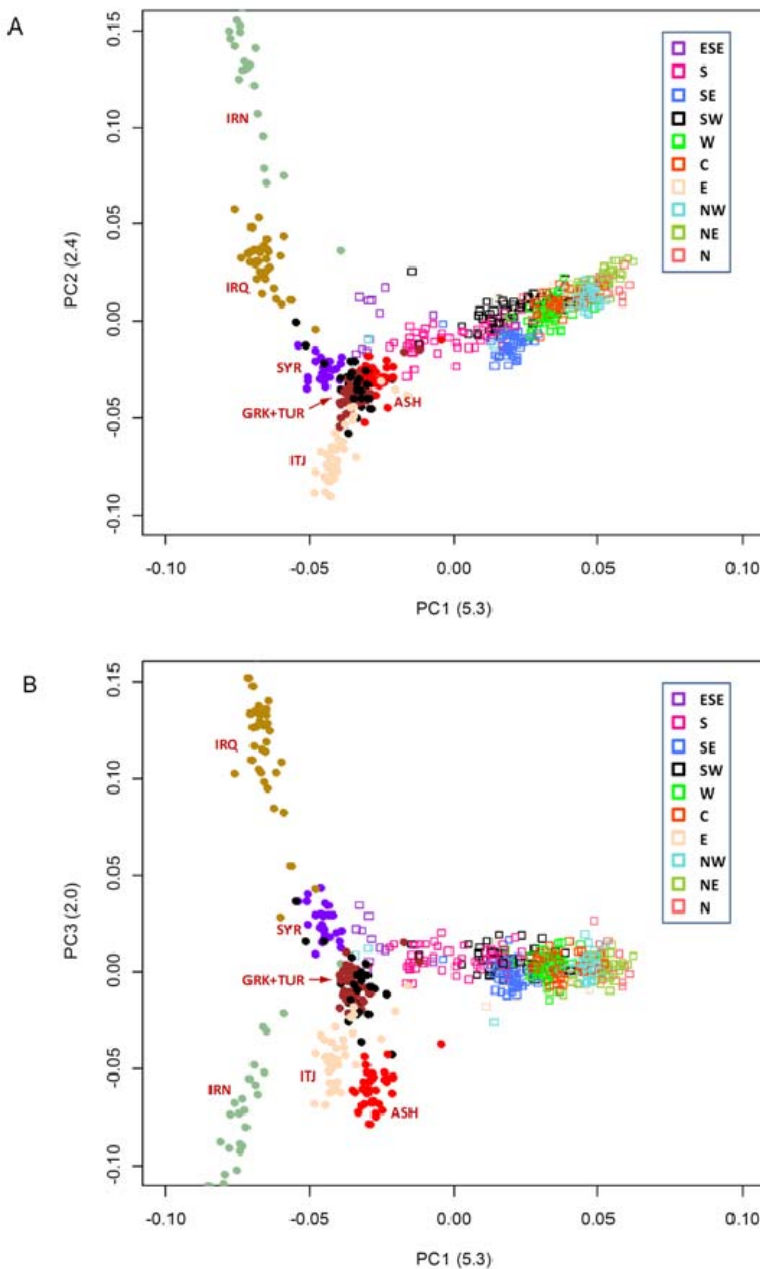

**Figure S1.** Principal component analysis of Jewish populations combined with selected PopRes populations. The Jewish samples are represented by large filled circles. Colored open squares represent PopRes samples grouped by different geographical origin in Europe. ESE, East Southeastern; S, Southern; SE, Southeastern; SW, Southwestern; W, Western; C, Central; E, Eastern; NW, Northwestern; NE, Northeastern; N, Northern. The list of countries from each geographical group can be found in supplemental methods.

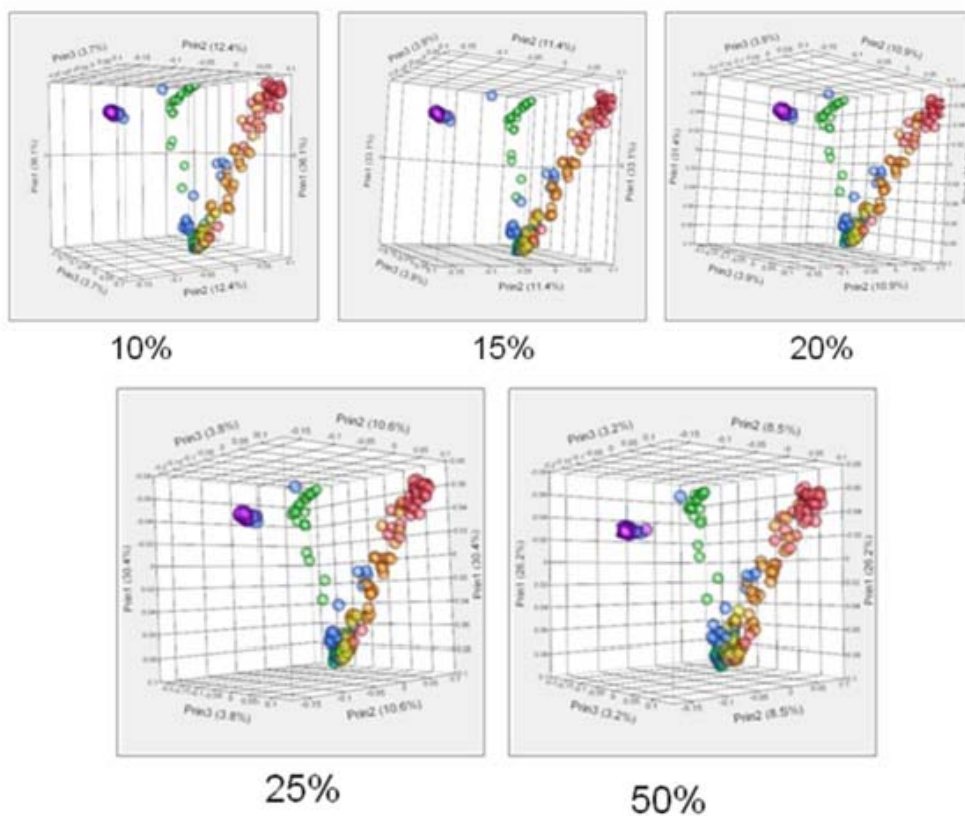

|            |     | Percentage of tail |          |          |          |          |
|------------|-----|--------------------|----------|----------|----------|----------|
| Comparison |     | 10%                | 15%      | 20%      | 25%      | 50%      |
| ASH        | ITG | 0.051755           | 0.045278 | 0.039793 | 0.03607  | 0.014566 |
| ASH        | IRN | 0.052773           | 0.05235  | 0.049922 | 0.04612  | 0.021964 |
| ASH        | TUR | 0.063995           | 0.054571 | 0.047573 | 0.042891 | 0.016607 |
| ASH        | GRK | 0.064175           | 0.054724 | 0.047732 | 0.043039 | 0.016551 |
| ASH        | IRQ | 0.073835           | 0.062447 | 0.054152 | 0.048615 | 0.018571 |
| ASH        | SYR | 0.108403           | 0.091458 | 0.079234 | 0.070847 | 0.025553 |
| IRN        | ITG | 0.046877           | 0.046482 | 0.044022 | 0.040202 | 0.01761  |
| IRN        | GRK | 0.055216           | 0.052455 | 0.048884 | 0.04436  | 0.018537 |
| IRN        | TUR | 0.056173           | 0.053436 | 0.049808 | 0.045205 | 0.018948 |
| IRN        | IRQ | 0.065271           | 0.06072  | 0.055824 | 0.05044  | 0.020805 |
| IRN        | SYR | 0.099149           | 0.089314 | 0.080597 | 0.072381 | 0.027672 |
| IRQ        | GRK | 0.019054           | 0.015514 | 0.013151 | 0.011619 | 0.004213 |
| IRQ        | TUR | 0.019208           | 0.015668 | 0.013296 | 0.011739 | 0.004432 |
| IRQ        | ITG | 0.026824           | 0.022336 | 0.018964 | 0.016766 | 0.00588  |
| IRQ        | SYR | 0.041908           | 0.034677 | 0.029802 | 0.026364 | 0.009057 |
| ITG        | GRK | 0.014398           | 0.012186 | 0.010378 | 0.009195 | 0.003013 |
| ITG        | TUR | 0.014682           | 0.012544 | 0.010737 | 0.009539 | 0.003294 |
| ITG        | SYR | 0.061458           | 0.051426 | 0.044088 | 0.039007 | 0.012744 |
| GRK        | TUR | 0.002753           | 0.00244  | 0.002193 | 0.002    | 0.000879 |
| GRK        | SYR | 0.04946            | 0.041349 | 0.035589 | 0.031503 | 0.010404 |
| SYR        | TUR | 0.049693           | 0.041624 | 0.03586  | 0.031769 | 0.010632 |

**Figure S2.** PCA calculation within selected tails (i.e 10,15,20,25 and 50% of genetic distance distribution) of total genomic CNVs (946k).

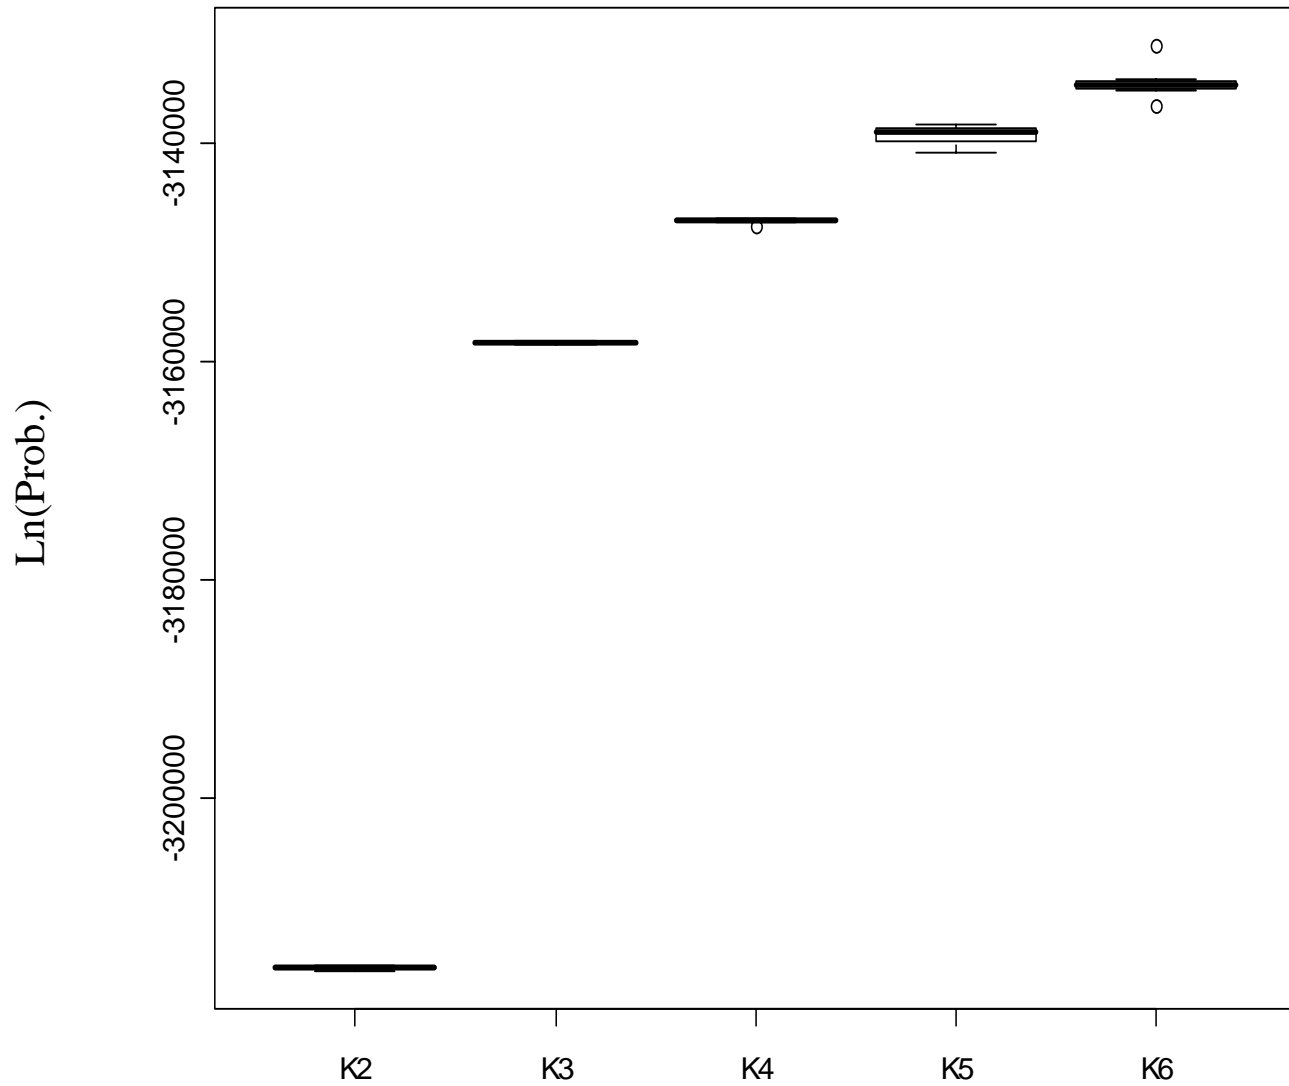

**Figure S3.** Likelihood scores for 10 iterations for Jewish and selected HGDP samples for K=2-6.

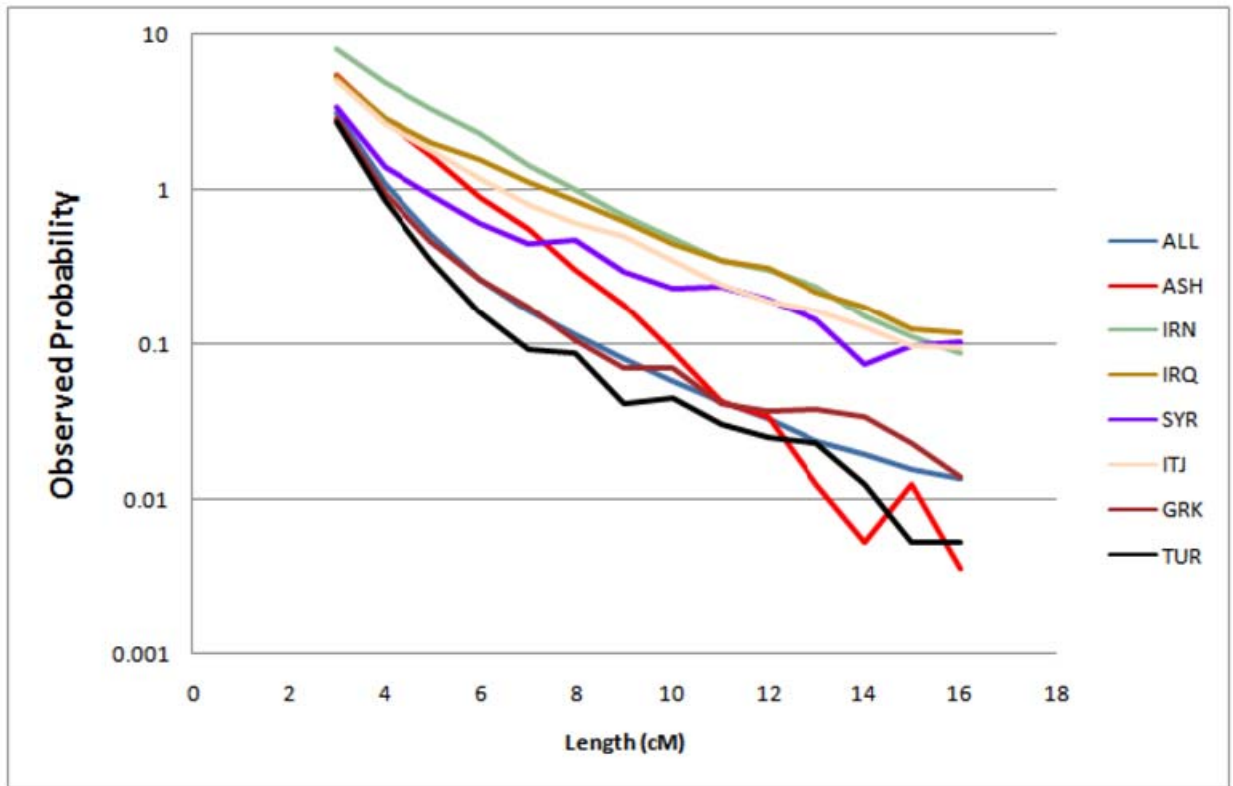

**Figure S4.** Distribution of segment lengths within each Jewish population. The expected number of IBD segments shared within each Jewish population (Y axis, logarithmic scale) for the discrete segment length range of 3 cM to 16 cM (X axis) were computed. An exponential decay rate (reflected by a linear behavior in the logarithmic scale) is representative of a recent population bottleneck. The behavior exhibited by the Ashkenazi population is consistent with the historical reports of a severe bottleneck followed by a rapid expansion, whereas the Greek and Turkish population decay suggests a more outbred profile.

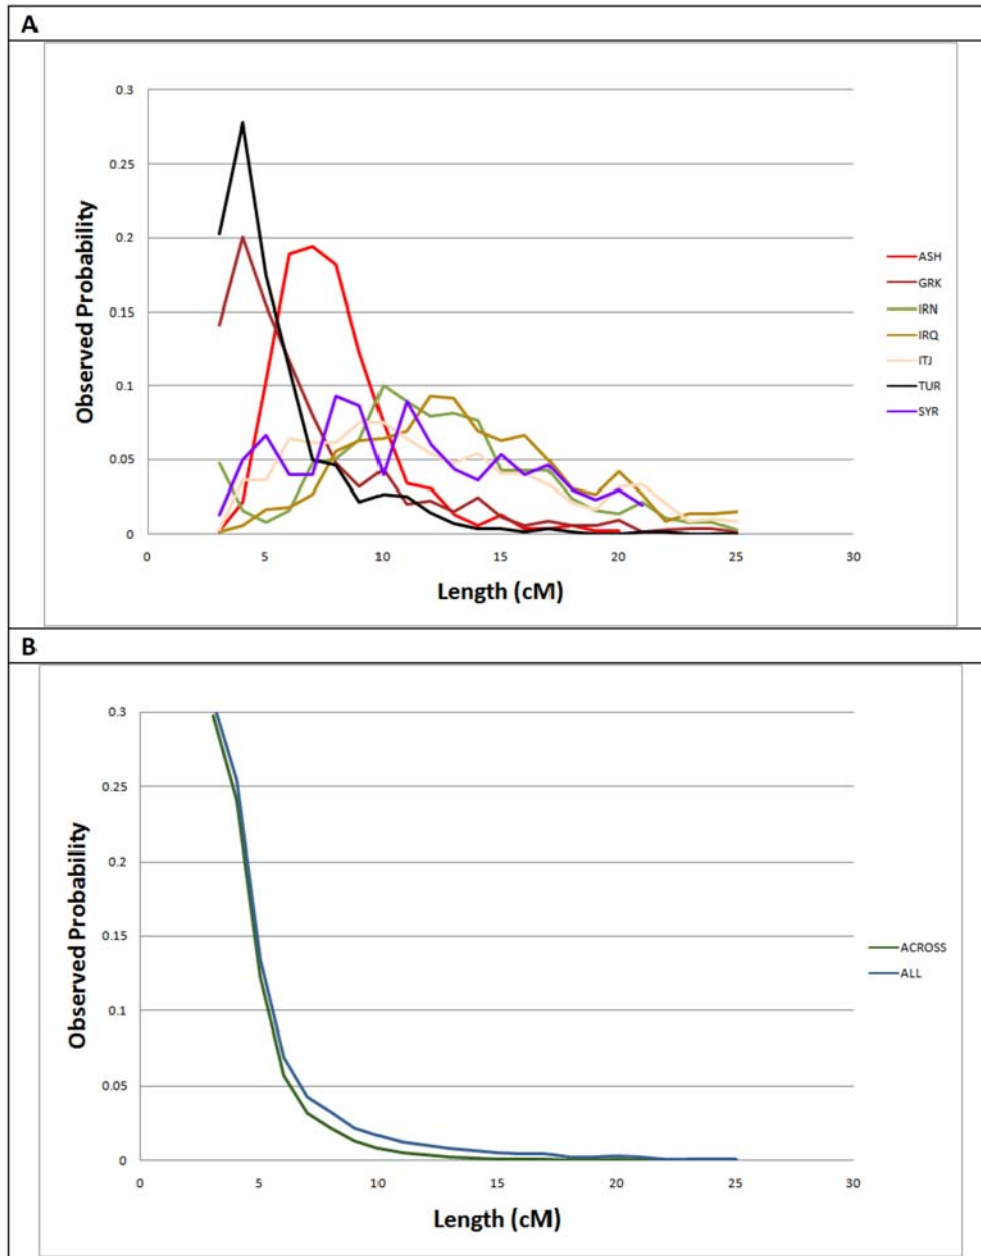

**Figure S5.** Distribution of longest IBD segments. The longest segments shared by the average pair of individuals as a function of the segment's length were computed. This distribution provides insights on the population's average time to most recent common ancestor. (A) Distribution of longest segments within each Jewish population. The average time to most common recent ancestor is larger for Turkish and Greek population, suggesting a more outbred profile than the other Jewish groups. (B) Distribution of longest segments for all possible pairs of Jewish individuals compared to the distribution of longest segments limited to pairs from different populations. The distribution for all possible pairs of individuals is shifted towards longer segments, reflecting the presence of closer relationships within populations. Short length for longest segments is expected across populations.

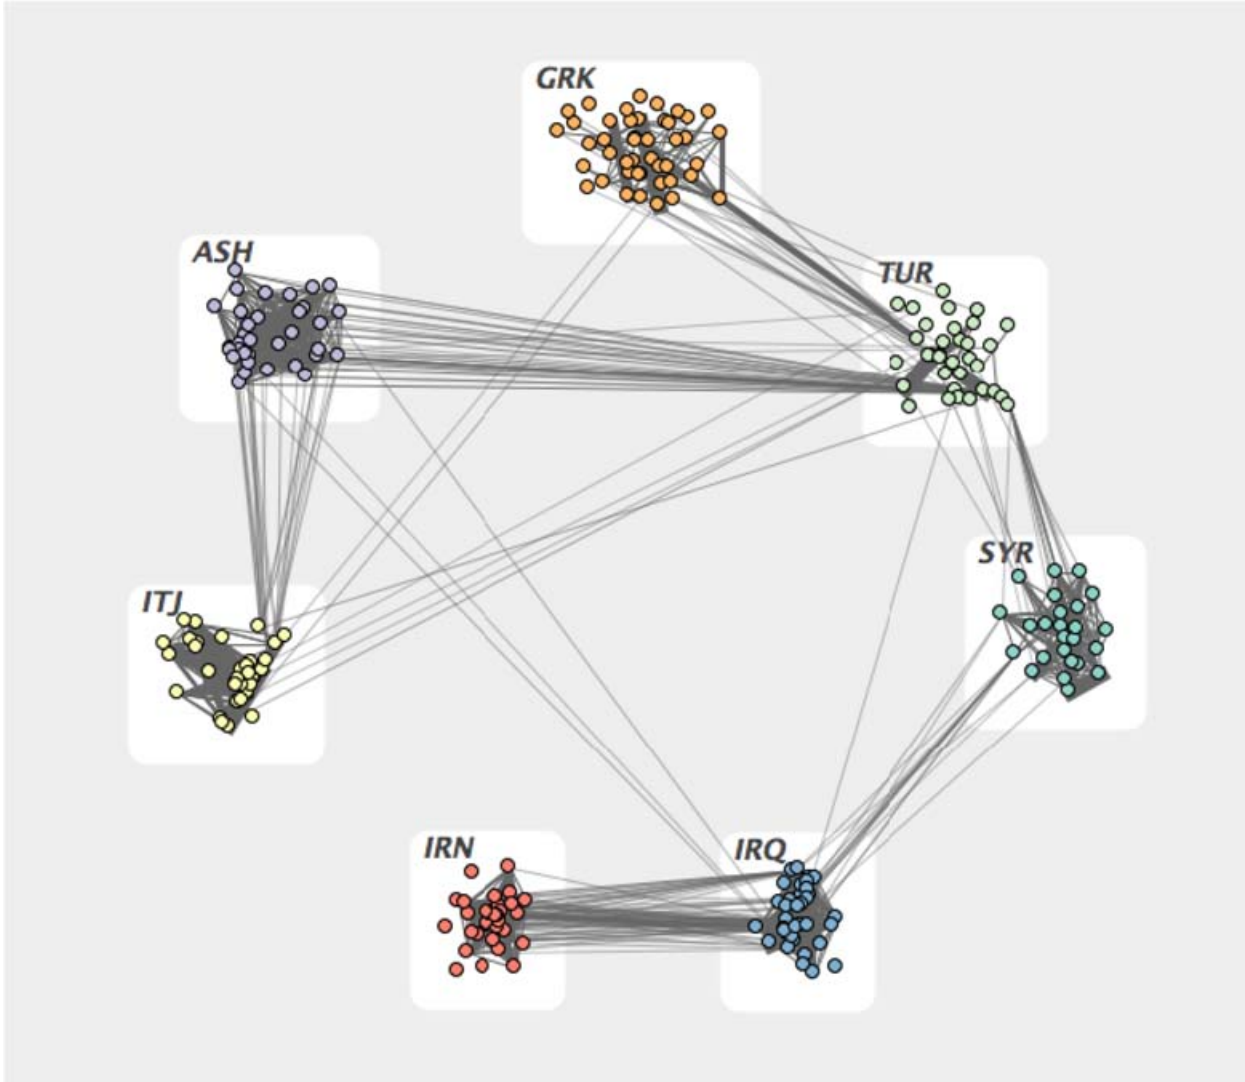

**Figure S6.** Network of relatedness between individuals. Each individual is represented by a node. Nodes are linked if the corresponding individuals are sharing >50cM of their genomes IBD.

A

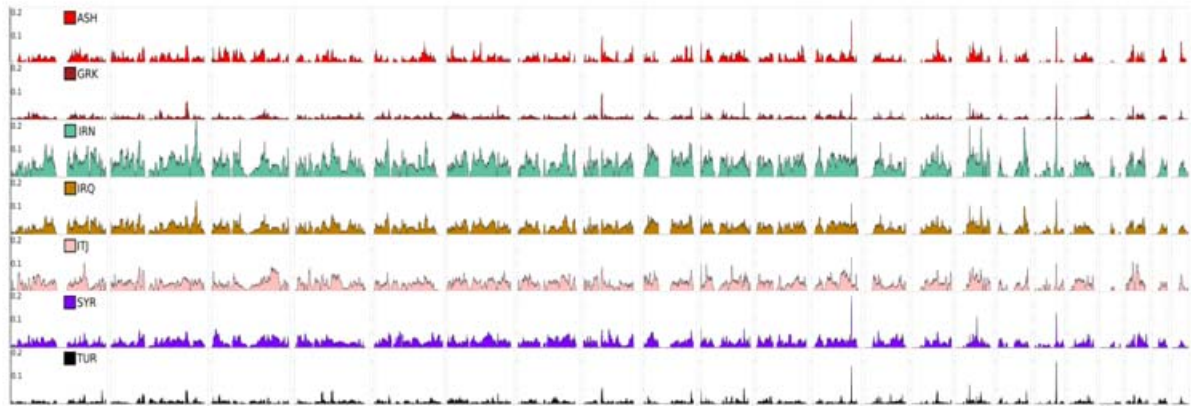

B

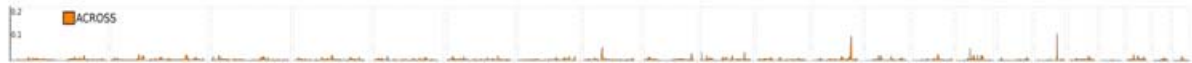

**Figure S7.** Manhattan plots of IBD sharing in Jewish populations. Normalized amount of sharing (Y axis) shown as a function of genomic position (X axis). (A) Sharing within populations for each Jewish group. (B) Sharing across populations.



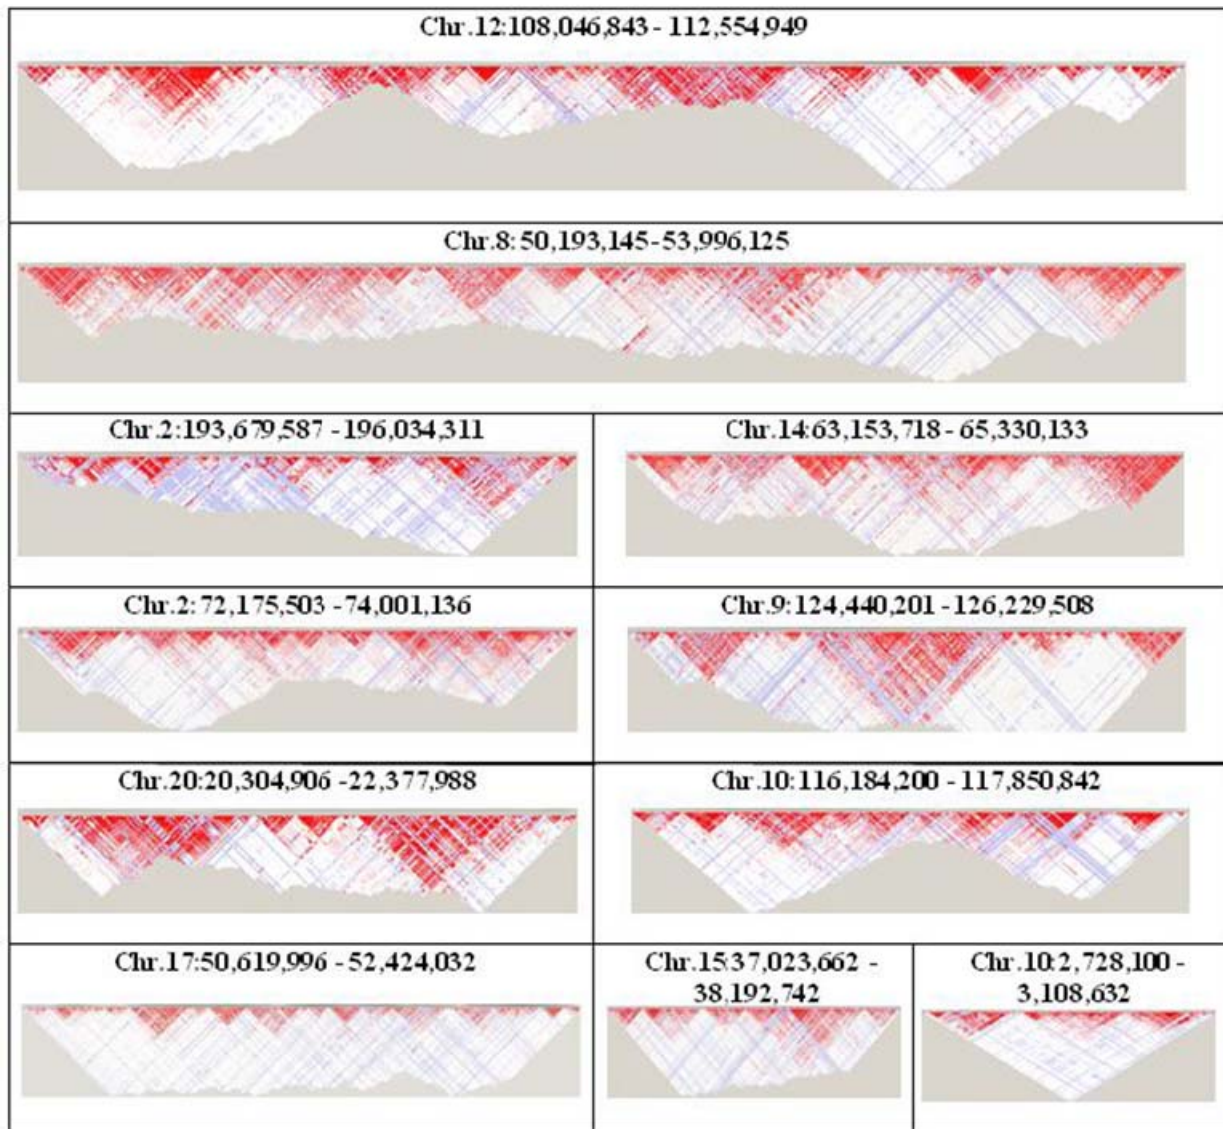

**Figure S8.** LD structure of IBD sharing peaks. Regions of intense sharing across Jewish populations were processed using the Haploview software package. The structure of LD blocks in the analyzed regions does not justify the observed levels of IBD sharing.



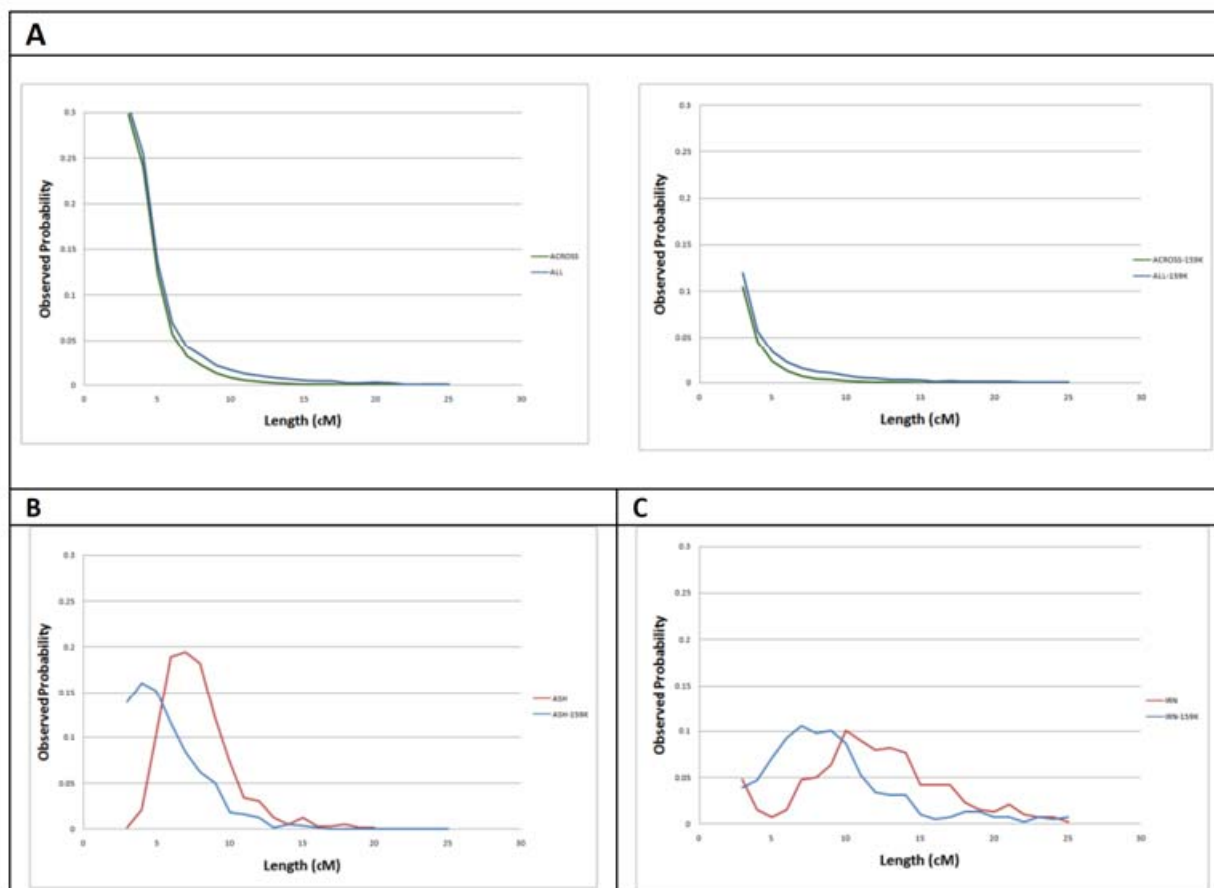

**Figure S9** – Evaluation of power for IBD discovery based on a sparse set of SNPs. The results of the IBD analysis for the Jewish populations using the full set of markers and the sparser set of SNPs from the platforms’ consensus were compared. (A) Distribution of longest segments for all possible Jewish pairs and limited to pairs across different populations. Comparison of the results for the full set (left) and the sparse set of markers (right). (B-C) Comparison of the results for the distribution of longest segments in the Ashkenazi and Iranian populations. Qualitatively similar results are obtained. Stricter parameters were employed in the IBD discovery phase for the sparser set of markers: long segments were excised, shifting the distributions towards shorter segments.

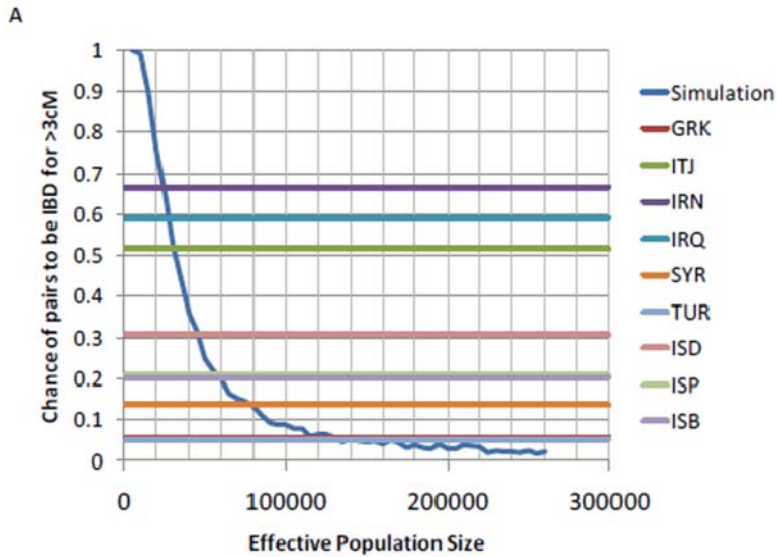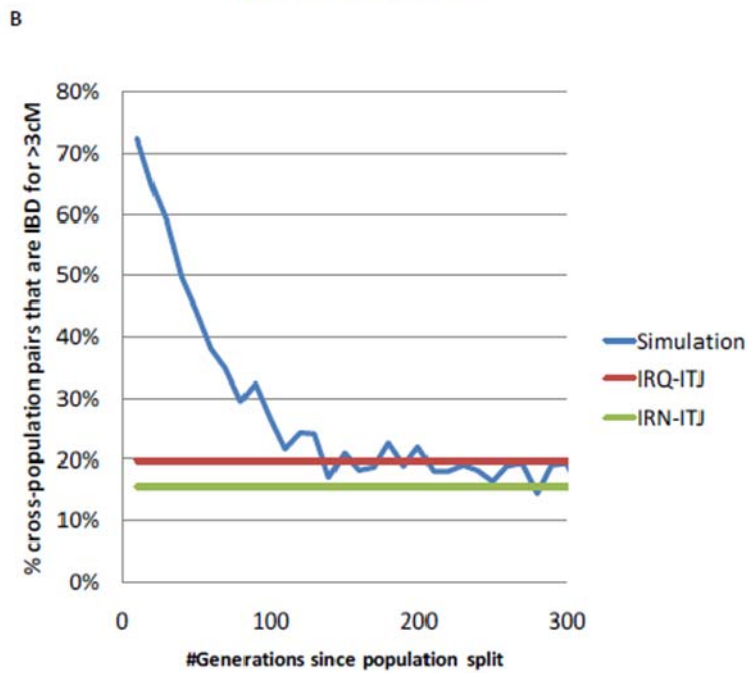

**Figure S10.** Inference of population history based on the observed fraction of individual pairs sharing a segment IBD (Y-axis) (A) First stage: simulation of a single population changing the ancestral population size (X-axis) to estimate the size appropriate for the Jewish and Middle Eastern non-Jewish populations. (B) Second stage : 2-population simulations changing the time of splits between Middle Eastern Jews and European (Italian) Jews is consistent with a population split 100-150 generations ago; the split between either of these groups and non-Jews is inconsistent with these simulation assumptions, as it predicts a distribution of shared segment lengths that does not fit any such scenario (data not shown), suggesting a more complex history than a simple split if a single ancestral population.<sup>38</sup>

**Table S1.** - Individuals genotyped, including country of origin and gender.

| <b>JHM ID</b> | <b>Pop.</b> | <b>Gender</b> | <b>JHM ID</b> | <b>Pop.</b> | <b>Gender</b> | <b>JHM ID</b> | <b>Pop.</b> | <b>Gender</b> |
|---------------|-------------|---------------|---------------|-------------|---------------|---------------|-------------|---------------|
| 3             | IRQ         | Female        | 307           | SYR         | Male          | 626           | GRK         | Female        |
| 4             | IRQ         | Male          | 308           | SYR         | Female        | 627           | GRK         | Male          |
| 5             | IRQ         | Male          | 311           | SYR         | Female        | 628           | GRK         | Male          |
| 6             | IRQ         | Male          | 312           | SYR         | Male          | 631           | GRK         | Female        |
| 7             | IRQ         | Female        | 313           | SYR         | Male          | 632           | GRK         | Female        |
| 15            | IRQ         | Female        | 315           | SYR         | Male          | 633           | GRK         | Male          |
| 17            | IRQ         | Female        | 316           | SYR         | Female        | 634           | GRK         | Female        |
| 21            | IRQ         | Female        | 317           | SYR         | Female        | 635           | GRK         | Male          |
| 23            | IRQ         | Female        | 318           | SYR         | Female        | 636           | GRK         | Female        |
| 24            | IRQ         | Male          | 323           | SYR         | Male          | 637           | GRK         | Female        |
| 28            | IRQ         | Female        | 325           | SYR         | Female        | 638           | GRK         | Male          |
| 29            | IRQ         | Female        | 330           | SYR         | Female        | 640           | GRK         | Female        |
| 30            | IRQ         | Male          | 331           | SYR         | Male          | 642           | GRK         | Male          |
| 32            | IRQ         | Male          | 332           | SYR         | Female        | 643           | GRK         | Female        |
| 33            | IRQ         | Male          | 333           | SYR         | Male          | 644           | GRK         | Female        |
| 36            | IRQ         | Male          | 336           | SYR         | Male          | 646           | GRK         | Male          |
| 37            | IRQ         | Female        | 341           | SYR         | Male          | 647           | GRK         | Male          |
| 40            | IRQ         | Female        | 351           | SYR         | Male          | 650           | GRK         | Male          |
| 52            | TUR         | Male          | 355           | SYR         | Female        | 651           | GRK         | Female        |
| 58            | TUR         | Male          | 358           | SYR         | Male          | 652           | GRK         | Male          |
| 59            | TUR         | Male          | 367           | SYR         | Male          | 654           | GRK         | Female        |
| 66            | TUR         | Female        | 368           | SYR         | Female        | 655           | GRK         | Male          |
| 68            | TUR         | Male          | 370           | SYR         | Female        | 657           | GRK         | Female        |
| 70            | TUR         | Female        | 371           | IRQ         | Female        | 662           | GRK         | Female        |
| 71            | TUR         | Male          | 375           | IRQ         | Female        | 663           | GRK         | Male          |
| 72            | TUR         | Male          | 378           | SYR         | Male          | 665           | GRK         | Female        |
| 76            | TUR         | Female        | 393           | IRQ         | Male          | 901           | ITJ         | Male          |
| 82            | IRN         | Female        | 399           | IRQ         | Male          | 902           | ITJ         | Female        |
| 83            | IRN         | Female        | 400           | IRQ         | Female        | 904           | ITJ         | Male          |
| 85            | IRN         | Male          | 402           | IRQ         | Male          | 909           | ITJ         | Female        |
| 87            | IRN         | Female        | 403           | IRQ         | Female        | 912           | ITJ         | Male          |
| 101           | IRN         | Male          | 440           | IRQ         | Female        | 913           | ITJ         | Female        |
| 104           | IRN         | Male          | 455           | IRQ         | Female        | 916           | ITJ         | Male          |
| 106           | IRN         | Female        | 457           | IRQ         | Male          | 917           | ITJ         | Female        |
| 129           | IRN         | Male          | 600           | GRK         | Male          | 1051          | TUR         | Female        |
| 136           | IRN         | Female        | 601           | GRK         | Female        | 1052          | TUR         | Female        |
| 148           | IRN         | Male          | 604           | GRK         | Male          | 1053          | TUR         | Female        |
| 151           | IRN         | Female        | 605           | GRK         | Male          | 1056          | TUR         | Female        |
| 157           | IRN         | Male          | 606           | GRK         | Male          | 1057          | TUR         | Female        |
| 158           | IRN         | Female        | 607           | GRK         | Female        | 1058          | TUR         | Female        |
| 159           | IRN         | Female        | 609           | GRK         | Male          | 1059          | TUR         | Female        |
| 164           | IRN         | Female        | 610           | GRK         | Male          | 1060          | TUR         | Male          |
| 167           | IRN         | Male          | 611           | GRK         | Male          | 1061          | TUR         | Male          |
| 180           | IRN         | Female        | 612           | GRK         | Female        | 1062          | TUR         | Female        |
| 188           | IRN         | Male          | 613           | GRK         | Male          | 1064          | TUR         | Female        |
| 196           | IRN         | Male          | 616           | GRK         | Male          | 1065          | TUR         | Female        |
| 268           | IRN         | Male          | 619           | GRK         | Male          | 1066          | TUR         | Female        |
| 273           | IRN         | Male          | 622           | GRK         | Male          | 1067          | TUR         | Female        |
| 276           | IRN         | Female        | 623           | GRK         | Female        | 1068          | TUR         | Male          |
| 305           | SYR         | Female        | 624           | GRK         | Female        | 1073          | TUR         | Female        |

**Table S2.** 95% confidence intervals for pairwise *Fst* between individual Jewish populations and between individual Jewish populations and populations in the HGDP panel

|                    | IRN                 | IRQ                 | SYR                 | ASH                 | ITJ                 | GRK                 | TUR                 | N_Italian           | Sardinian           | French              | Basque              | Adygei              | Russian             | Palestinian         | Druze               | Bedouin             |
|--------------------|---------------------|---------------------|---------------------|---------------------|---------------------|---------------------|---------------------|---------------------|---------------------|---------------------|---------------------|---------------------|---------------------|---------------------|---------------------|---------------------|
| <b>IRN</b>         | 0.01577-<br>0.01589 | 0.01618-<br>0.01632 | 0.01636-<br>0.01648 | 0.01886-<br>0.01901 | 0.01518-<br>0.01530 | 0.01521-<br>0.01534 | 0.01925-<br>0.01940 | 0.02839-<br>0.02858 | 0.02229-<br>0.02244 | 0.03074-<br>0.03094 | 0.01763-<br>0.01779 | 0.02835-<br>0.02853 | 0.01633-<br>0.01645 | 0.01700-<br>0.01712 | 0.02163-<br>0.02176 |                     |
| <b>IRQ</b>         |                     | 0.00801-<br>0.00811 | 0.01358-<br>0.01370 | 0.01215-<br>0.01225 | 0.00849-<br>0.00858 | 0.00827-<br>0.00836 | 0.01202-<br>0.01215 | 0.02053-<br>0.02067 | 0.01642-<br>0.01654 | 0.02422-<br>0.02438 | 0.01250-<br>0.01263 | 0.02414-<br>0.02430 | 0.01108-<br>0.01118 | 0.01178-<br>0.01188 | 0.01541-<br>0.01553 |                     |
| <b>SYR</b>         |                     |                     | 0.00972-<br>0.00984 | 0.00822-<br>0.00831 | 0.00336-<br>0.00343 | 0.00344-<br>0.00352 | 0.00762-<br>0.00774 | 0.01474-<br>0.01488 | 0.01142-<br>0.01154 | 0.01916-<br>0.01932 | 0.00938-<br>0.00951 | 0.01871-<br>0.01886 | 0.00728-<br>0.00737 | 0.00843-<br>0.00854 | 0.01080-<br>0.01091 |                     |
| <b>ASH</b>         |                     |                     |                     | 0.00924-<br>0.00934 | 0.00611-<br>0.00619 | 0.00534-<br>0.00542 | 0.00951-<br>0.00963 | 0.01615-<br>0.01629 | 0.01087-<br>0.01097 | 0.01756-<br>0.01772 | 0.01255-<br>0.01269 | 0.01740-<br>0.01754 | 0.01194-<br>0.01204 | 0.01285-<br>0.01296 | 0.01752-<br>0.01764 |                     |
| <b>ITJ</b>         |                     |                     |                     |                     | 0.00508-<br>0.00515 | 0.00514-<br>0.00521 | 0.00877-<br>0.00888 | 0.01455-<br>0.01467 | 0.01175-<br>0.01186 | 0.01818-<br>0.01832 | 0.01287-<br>0.01301 | 0.01877-<br>0.01891 | 0.01054-<br>0.01063 | 0.01099-<br>0.01109 | 0.01483-<br>0.01494 |                     |
| <b>GRK</b>         |                     |                     |                     |                     |                     | 0.00048-<br>0.00053 | 0.00417-<br>0.00427 | 0.01049-<br>0.01059 | 0.00730-<br>0.00738 | 0.01390-<br>0.01402 | 0.00853-<br>0.00865 | 0.01444-<br>0.01456 | 0.00591-<br>0.00598 | 0.00697-<br>0.00704 | 0.01052-<br>0.01061 |                     |
| <b>TUR</b>         |                     |                     |                     |                     |                     |                     | 0.00424-<br>0.00434 | 0.01054-<br>0.01066 | 0.00700-<br>0.00710 | 0.01323-<br>0.01335 | 0.00835-<br>0.00847 | 0.01436-<br>0.01448 | 0.00547-<br>0.00555 | 0.00612-<br>0.00620 | 0.00948-<br>0.00957 |                     |
| <b>N_Italian</b>   |                     |                     |                     |                     |                     |                     |                     | 0.00748-<br>0.00760 | 0.00190-<br>0.00199 | 0.00799-<br>0.00811 | 0.00702-<br>0.00715 | 0.00826-<br>0.00839 | 0.01112-<br>0.01124 | 0.01046-<br>0.01058 | 0.01744-<br>0.01759 |                     |
| <b>Sardinian</b>   |                     |                     |                     |                     |                     |                     |                     |                     | 0.00971-<br>0.00981 | 0.01397-<br>0.01409 | 0.02039-<br>0.02056 | 0.02036-<br>0.02052 | 0.01759-<br>0.01772 | 0.01779-<br>0.01792 | 0.02331-<br>0.02346 |                     |
| <b>French</b>      |                     |                     |                     |                     |                     |                     |                     |                     |                     | 0.00726-<br>0.00737 | 0.01014-<br>0.01027 | 0.00554-<br>0.00564 | 0.01459-<br>0.01469 | 0.01424-<br>0.01436 | 0.02100-<br>0.02114 |                     |
| <b>Basque</b>      |                     |                     |                     |                     |                     |                     |                     |                     |                     |                     | 0.01810-<br>0.01827 | 0.01426-<br>0.01439 | 0.02050-<br>0.02064 | 0.02096-<br>0.02111 | 0.02733-<br>0.02750 |                     |
| <b>Adygei</b>      |                     |                     |                     |                     |                     |                     |                     |                     |                     |                     |                     | 0.01334-<br>0.01349 | 0.01222-<br>0.01235 | 0.01200-<br>0.01213 | 0.01769-<br>0.01783 |                     |
| <b>Russian</b>     |                     |                     |                     |                     |                     |                     |                     |                     |                     |                     |                     |                     | 0.02125-<br>0.02139 | 0.02187-<br>0.02202 | 0.02808-<br>0.02824 |                     |
| <b>Palestinian</b> |                     |                     |                     |                     |                     |                     |                     |                     |                     |                     |                     |                     |                     |                     | 0.00807-<br>0.00815 | 0.00825-<br>0.00833 |
| <b>Druze</b>       |                     |                     |                     |                     |                     |                     |                     |                     |                     |                     |                     |                     |                     |                     |                     | 0.01217-<br>0.01227 |
| <b>Bedouin</b>     |                     |                     |                     |                     |                     |                     |                     |                     |                     |                     |                     |                     |                     |                     |                     |                     |

**Table S3.** Pairwise *Fst* between major Jewish groups (Middle-East Jews and European/Syrian Jews) and the populations in HGDP panel.

|                             | <b>Middle-East Jews</b>          | <b>European/Syrian Jews</b>      |
|-----------------------------|----------------------------------|----------------------------------|
| <b>European/Syrian Jews</b> | <b>0.00677</b> (0.00675-0.00680) |                                  |
| <b>N_Italian</b>            | <b>0.01124</b> (0.01119-0.01130) | <b>0.00462</b> (0.00458-0.00465) |
| <b>Sardinian</b>            | <b>0.01995</b> (0.01988-0.02001) | <b>0.01085</b> (0.01081-0.01090) |
| <b>French</b>               | <b>0.01505</b> (0.01500-0.01510) | <b>0.00738</b> (0.00734-0.00741) |
| <b>Basque</b>               | <b>0.02310</b> (0.02302-0.02317) | <b>0.01395</b> (0.01390-0.01400) |
| <b>Adygei</b>               | <b>0.01071</b> (0.01065-0.01077) | <b>0.00822</b> (0.00817-0.00827) |
| <b>Russian</b>              | <b>0.02212</b> (0.02204-0.02219) | <b>0.01446</b> (0.01441-0.01451) |
| <b>Palestinian</b>          | <b>0.00971</b> (0.00968-0.00975) | <b>0.00635</b> (0.00632-0.00638) |
| <b>Druze</b>                | <b>0.01021</b> (0.01017-0.01025) | <b>0.00701</b> (0.00699-0.00704) |
| <b>Bedouin</b>              | <b>0.01457</b> (0.01452-0.01463) | <b>0.01101</b> (0.01097-0.01105) |

**Table S4.** ANOVA of population PCAs average.

| PCA1        | IRN | IRQ    | SYR    | ASH    | ITJ    | GRK    | TUR    | N_Italian | Sardinian | French | Basque | Adygei | Russian | Palestinian | Druze  | Bedouin |
|-------------|-----|--------|--------|--------|--------|--------|--------|-----------|-----------|--------|--------|--------|---------|-------------|--------|---------|
| IRN         |     | 0.1903 | <.0001 | <.0001 | <.0001 | <.0001 | <.0001 | <.0001    | <.0001    | <.0001 | <.0001 | <.0001 | <.0001  | 0.0005      | <.0001 | <.0001  |
| IRQ         |     |        | <.0001 | <.0001 | <.0001 | <.0001 | <.0001 | <.0001    | <.0001    | <.0001 | <.0001 | <.0001 | <.0001  | <.0001      | 0.0067 | <.0001  |
| SYR         |     |        |        | <.0001 | <.0001 | <.0001 | <.0001 | <.0001    | <.0001    | <.0001 | <.0001 | <.0001 | <.0001  | <.0001      | <.0001 | <.0001  |
| ASH         |     |        |        |        | <.0001 | <.0001 | <.0001 | <.0001    | <.0001    | <.0001 | <.0001 | 0.0349 | <.0001  | <.0001      | <.0001 | <.0001  |
| ITJ         |     |        |        |        |        | 0.5137 | 0.6861 | <.0001    | <.0001    | <.0001 | <.0001 | <.0001 | <.0001  | <.0001      | <.0001 | <.0001  |
| GRK         |     |        |        |        |        |        | 0.2918 | <.0001    | <.0001    | <.0001 | <.0001 | <.0001 | <.0001  | <.0001      | <.0001 | <.0001  |
| TUR         |     |        |        |        |        |        |        | <.0001    | <.0001    | <.0001 | <.0001 | <.0001 | <.0001  | <.0001      | <.0001 | <.0001  |
| N_Italian   |     |        |        |        |        |        |        |           | 0.2844    | <.0001 | <.0001 | <.0001 | <.0001  | <.0001      | <.0001 | <.0001  |
| Sardinian   |     |        |        |        |        |        |        |           |           | <.0001 | <.0001 | <.0001 | <.0001  | <.0001      | <.0001 | <.0001  |
| French      |     |        |        |        |        |        |        |           |           |        | <.0001 | <.0001 | <.0001  | <.0001      | <.0001 | <.0001  |
| Basque      |     |        |        |        |        |        |        |           |           |        |        | <.0001 | <.0001  | <.0001      | <.0001 | <.0001  |
| Adygei      |     |        |        |        |        |        |        |           |           |        |        |        | <.0001  | <.0001      | <.0001 | <.0001  |
| Russian     |     |        |        |        |        |        |        |           |           |        |        |        | 0.3992  | <.0001      | <.0001 | <.0001  |
| Palestinian |     |        |        |        |        |        |        |           |           |        |        |        |         | <.0001      | <.0001 | <.0001  |
| Druze       |     |        |        |        |        |        |        |           |           |        |        |        |         |             | <.0001 | <.0001  |

  

| PCA2        | IRN | IRQ    | SYR    | ASH      | ITJ      | GRK      | TUR      | N_Italian  | Sardinian | French   | Basque   | Adygei   | Russian  | Palestinian | Druze    | Bedouin |
|-------------|-----|--------|--------|----------|----------|----------|----------|------------|-----------|----------|----------|----------|----------|-------------|----------|---------|
| IRN         |     | <.0001 | <.0001 | <.0001   | <.0001   | <.0001   | <.0001   | <.0001     | <.0001    | <.0001   | <.0001   | <.0001   | <.0001   | <.0001      | <.0001   | <.0001  |
| IRQ         |     |        | <.0001 | <.0001   | <.0001   | 0.003266 | <.0001   | <.0001     | <.0001    | <.0001   | <.0001   | <.0001   | <.0001   | <.0001      | <.0001   | <.0001  |
| SYR         |     |        |        | 0.780547 | 0.073169 | <.0001   | 0.011957 | <.0001     | <.0001    | <.0001   | <.0001   | 0.002773 | <.0001   | <.0001      | 0.757846 | <.0001  |
| ASH         |     |        |        |          | 0.023892 | 0.000415 | 0.002467 | <.0001     | <.0001    | <.0001   | <.0001   | 0.00349  | <.0001   | <.0001      | 0.977098 | <.0001  |
| ITJ         |     |        |        |          |          | 0.211799 | 0.400707 | 0.0006841  | <.0001    | <.0001   | <.0001   | <.0001   | 0.002627 | <.0001      | 0.020277 | <.0001  |
| GRK         |     |        |        |          |          |          | 0.722138 | 0.015067   | <.0001    | 0.000217 | <.0001   | <.0001   | 0.047883 | <.0001      | 0.0003   | <.0001  |
| TUR         |     |        |        |          |          |          |          | 0.00843921 | <.0001    | 0.000117 | <.0001   | <.0001   | 0.027345 | <.0001      | 0.001947 | <.0001  |
| N_Italian   |     |        |        |          |          |          |          |            | <.0001    | 0.373432 | <.0001   | <.0001   | 0.610297 | 0.1739838   | <.0001   | <.0001  |
| Sardinian   |     |        |        |          |          |          |          |            |           | 0.000427 | 0.317682 | <.0001   | <.0001   | 0.00078806  | <.0001   | <.0001  |
| French      |     |        |        |          |          |          |          |            |           |          | <.0001   | <.0001   | 0.138662 | 0.6532716   | <.0001   | <.0001  |
| Basque      |     |        |        |          |          |          |          |            |           |          |          | <.0001   | <.0001   | <.0001      | <.0001   | <.0001  |
| Adygei      |     |        |        |          |          |          |          |            |           |          |          |          | <.0001   | 0.04315468  | 0.003443 | <.0001  |
| Russian     |     |        |        |          |          |          |          |            |           |          |          |          |          | <.0001      | <.0001   | <.0001  |
| Palestinian |     |        |        |          |          |          |          |            |           |          |          |          |          |             | <.0001   | <.0001  |
| Druze       |     |        |        |          |          |          |          |            |           |          |          |          |          |             |          | <.0001  |

  

| PCA3        | IRN | IRQ    | SYR    | ASH      | ITJ    | GRK      | TUR      | N_Italian  | Sardinian  | French | Basque   | Adygei   | Russian | Palestinian | Druze    | Bedouin  |
|-------------|-----|--------|--------|----------|--------|----------|----------|------------|------------|--------|----------|----------|---------|-------------|----------|----------|
| IRN         |     | <.0001 | <.0001 | <.0001   | <.0001 | <.0001   | <.0001   | <.0001     | <.0001     | <.0001 | <.0001   | 0.002932 | <.0001  | <.0001      | <.0001   | <.0001   |
| IRQ         |     |        | <.0001 | <.0001   | <.0001 | <.0001   | <.0001   | 0.58983262 | <.0001     | <.0001 | 0.111731 | <.0001   | <.0001  | <.0001      | <.0001   | <.0001   |
| SYR         |     |        |        | 0.074604 | <.0001 | 0.062977 | 0.787726 | <.0001     | <.0001     | <.0001 | <.0001   | <.0001   | <.0001  | 0.01334626  | 0.024763 | <.0001   |
| ASH         |     |        |        |          | <.0001 | <.0001   | 0.02597  | 0.0007077  | <.0001     | <.0001 | <.0001   | <.0001   | <.0001  | 0.48075355  | 0.629081 | <.0001   |
| ITJ         |     |        |        |          |        | <.0001   | <.0001   | <.0001     | 0.00508519 | <.0001 | <.0001   | <.0001   | <.0001  | <.0001      | <.0001   | <.0001   |
| GRK         |     |        |        |          |        |          | 0.08374  | <.0001     | <.0001     | <.0001 | <.0001   | <.0001   | <.0001  | <.0001      | <.0001   | <.0001   |
| TUR         |     |        |        |          |        |          |          | <.0001     | <.0001     | <.0001 | <.0001   | <.0001   | <.0001  | 0.00271076  | 0.006211 | <.0001   |
| N_Italian   |     |        |        |          |        |          |          |            | <.0001     | <.0001 | 0.059245 | <.0001   | <.0001  | 0.00410764  | 0.002624 | <.0001   |
| Sardinian   |     |        |        |          |        |          |          |            |            | <.0001 | <.0001   | <.0001   | <.0001  | <.0001      | <.0001   | <.0001   |
| French      |     |        |        |          |        |          |          |            |            |        | <.0001   | <.0001   | <.0001  | <.0001      | <.0001   | 0.000368 |
| Basque      |     |        |        |          |        |          |          |            |            |        |          | <.0001   | <.0001  | <.0001      | <.0001   | <.0001   |
| Adygei      |     |        |        |          |        |          |          |            |            |        |          |          | <.0001  | <.0001      | <.0001   | <.0001   |
| Russian     |     |        |        |          |        |          |          |            |            |        |          |          | <.0001  | 0.01904813  | <.0001   | <.0001   |
| Palestinian |     |        |        |          |        |          |          |            |            |        |          |          |         | <.0001      | <.0001   | <.0001   |
| Druze       |     |        |        |          |        |          |          |            |            |        |          |          |         |             | 0.828882 | <.0001   |



**Table S5.** Permutation tests for between-group identity by state (IBS) differences

| <b>Populations</b> | <b><i>N</i></b> | <b>IRN</b> | <b>IRQ</b>           | <b>SYR</b>           | <b>ASH</b>           | <b>ITJ</b>           | <b>GRK</b>           | <b>TUR</b>           |
|--------------------|-----------------|------------|----------------------|----------------------|----------------------|----------------------|----------------------|----------------------|
| <b>IRN</b>         | 28              |            | 1.0X10 <sup>-5</sup> |
| <b>IRQ</b>         | 37              |            |                      | 1.0X10 <sup>-5</sup> |
| <b>SYR</b>         | 25              |            |                      |                      | 1.0X10 <sup>-5</sup> | 1.0X10 <sup>-5</sup> | 1.0X10 <sup>-5</sup> | 1.0X10 <sup>-5</sup> |
| <b>ASH</b>         | 34              |            |                      |                      |                      | 1.0X10 <sup>-5</sup> | 1.0X10 <sup>-5</sup> | 1.0X10 <sup>-5</sup> |
| <b>ITJ</b>         | 37              |            |                      |                      |                      |                      | 1.0X10 <sup>-5</sup> | 1.0X10 <sup>-5</sup> |
| <b>GRK</b>         | 42              |            |                      |                      |                      |                      |                      | 1.0X10 <sup>-5</sup> |
| <b>TUR</b>         | 34              |            |                      |                      |                      |                      |                      |                      |

**Table S6** – Gene content for regions of high IBD sharing

| Chr | Start       | End         | Genes                                                                                                                                                                                                             |
|-----|-------------|-------------|-------------------------------------------------------------------------------------------------------------------------------------------------------------------------------------------------------------------|
| 2   | 193,679,587 | 196,034,311 | --                                                                                                                                                                                                                |
| 2   | 72,175,503  | 74,001,136  | EXOC6B, EMX1, ALMS1, STAMBP, SPR,<br>RAB11FIP5, FBXO41, EGR4, NAT8,<br>DUSP11, ACTG2                                                                                                                              |
| 8   | 50,193,145  | 53,996,125  | SNTG1, RB1CC1                                                                                                                                                                                                     |
| 9   | 124,440,201 | 126,229,508 | LHX2, STRBP, CRB2, NEK6, PDCL,<br>GPR21, PSMB7                                                                                                                                                                    |
| 10  | 116,184,200 | 117,850,842 | TRUB1                                                                                                                                                                                                             |
| 10  | 2,728,100   | 3,108,632   | --                                                                                                                                                                                                                |
| 12  | 108,046,843 | 112,554,949 | CDV1, TPCN1, ACACB, RAD9B, MYL2,<br>SH2B3, ATXN2, PTPN11, RPH3A, FOXN4,<br>MMAB, MVK, TRPV4, ATP2A2, TECT1,<br>PPP1CC, ALDH2, MAPKAPK5, C12orf8,<br>RPL6, OAS1, OAS3, OAS2, DTX1,<br>RASAL1, DDX54, SLC24A6, LHX5 |
| 14  | 63,153,718  | 65,330,133  | MTHFD1, FUT8, SYNE2, SPTB, MAX,<br>ESR2, ZBTB25, HSPA2, GPX2, FNTB                                                                                                                                                |
| 15  | 37,023,662  | 38,192,742  | THBS1, GPR176, SRP14, BMF                                                                                                                                                                                         |
| 17  | 50,619,996  | 52,424,032  | HLF, PCTP, NOG, DGKE, TRIM25, COIL                                                                                                                                                                                |
| 20  | 20,304,906  | 22,377,988  | XRN2, NKX2-4, NKX2-2, PAX1                                                                                                                                                                                        |
